# Supplementary material for: Transcriptomics Identifies Modules of Differentially Expressed Genes and Novel Cyclotides in Viola pubescens
Source: Front Plant Sci. 2019 Feb 15;10:156. doi: 10.3389/fpls.2019.00156 (PMC6384259; doi:10.3389/fpls.2019.00156)
Supplement: Supplementary file 1 [file Data_Sheet_1.FASTA]

Key: >species_accession

>V.tricolor_ALI30830.1
MDAKNSLVRLLLLIIAIFALPCLASFERDLITPVAIQAILQKTSSDFNFMLSQSSEVTSKIVVADNLVLEEALLMMRRSDEKLGGIPCGETCIFGRCHTGIIGCACEKYMCCKNSLPS
>V.tricolor_ALI30828.1
MDYSKIVVVSLVLAAAIVALPYLQPSKTVVGKDFITTEAVKAIHLQTKSDAKPLEHAINALTSKTLISSDVLNEALLLNNDKNGLIPCGESCAWFPFCFTETIGCSCQNKICYFM
>V.tricolor_ALI30827.1
MEMKRMIVGLVLIATFALPALNATFEKDFITREAINRVLKKVSPNSNGMLDEQAIIALTGKILVSNPIIEEALLKHSNLNGLGGDIPCGESCVYIPCITGVLGCSCSHNVCYYNSLAAN
>V.tricolor_ALI30823.1
MERTKKMMIVGFLVLVMAAFALPPAFAVFEKDIITPKGVRMAFGEAALHLDEEAIYALTGKVLISNPIIEAALIQHSDPLAGVPCGESCNVIPCIASLSCRCKSKVCFQNSLDN
>V.tricolor_ALI30822.1
MMKIQLVGFVLLLAAFALPSLASSFQKDVVSTSAIEAVLKLRGLSKLEDDPALSALAHTKTIISNPVIEDALLNGPSMRAGNGIPCAESCVWIPCTVTALVGCSCSEKVCYYNSLQTKN
>V.tricolor_ALI30821.1
MEMKKMIVGFLLVATYALPPLHATLEKDFISPEAINMVLKKLSSNAMLDEQALAALTGKILVSNPIIEEALLQHSNLNGPLGGSWPCGESCVYIPCITSIAGCECSKNVCYKNSLAVN
>V.tricolor_ALI30820.1
MEMKSMIVGFVLIAAFALPALAAFEKDVITPRAVRMILEKVSPNSNMNMLDEKVISALTSKTLISNPLVEEALLKQHNTLGGSIPCGESCVWIPCISGIAGCSCSNKVCYLNSLAN
>G.pauciflorum_GlopaF
SCVFLPCLSVSLGCSCKNKVCYRNGRLPCGE
>G.pauciflorum_GlopaG
SCVFLPCLSAVLGCSCKNKVCYRNGRLPCGE
>H.denticulatus_HydeA
SCVFDRTCHLAGCGCGSTVPLCVRNGVLPCGE
>H.oborata_HoboA
TCTLGTCNTPGCTCSWPLCTKNGLPTCGE
>M.macrophyllus_MemaA
SCVWLPCTVTALLGCSCKDKVCYRNGLPCAE
>M.macrophyllus_MemaB
SCVWLPCLTGLVGCSCKNNVCYTNGTVPCGE
>O.oblanceolatum_OrtoA
SCVYLPCLLTAPLGCSCKNKVCYRNGLPCGE
>R.gracilipes_RigraA
SCVWLPCTVTALLGCKCETRGCTLNGVPCGE
>R.lindeniana_RiliA
SCVWLPCTVTALLGCTCVDRVCFLDGLPCAE
>R.lindeniana_RiliB
TCAGGTCNTPGCSCTWPLCTRNGLPVCGE
>V.decumbens_VideA
SCVFLPCLTSALGCSCKSKVCYRNGLPCGE
>V.nivalis_ViniA
SCVWLPCLSGLAGCSCKNKVCYYDGSVPCGE
>V.cotyldeon_P84635.1(vico-A)
GSIPCAESCVYIPCFTGIAGCSCKNKVCYYN
>V.cotyledon_P84636.1(vico-B)
GSIPCAESCVYIPCITGIAGCSCKNKVCYYN
>H.floribundus_P84647.1(Hyfl-A)
SISCGESCVYIPCTVTALVGCTCKDKVCYLN
>H.floribundus_P84649.1(Hyfl-C)
GSPRQCAETCFIGKCYTEELGCTCTAFLCMKN
>M.dentatus_C0HKJ3.1(mden-K)
GSIPCGESCVWIPCISSVVGCACKNKVCYKN
>M.dentatus_C0HKI9.1(mden-G)
GIPCAESCVYIPCITAALGCSCKNKVCYRN
>M.dentatus_C0HKJ4.1(mden-L)
GSIPCGESCVYIPCISAVLGCSCKNKVCYRN
>M.dentatus_C0HKJ5.1(mden-M)
GTIPCGESCVYIPCITSALGCSCKKKVCYKN
>M.dentatus_C0HKJ1.1(mden-I)
GIPCGESCVYIPCITTAIGCSCKNKVCYRN
>M.dentatus_C0HKI7.1(mden-E)
GIPCGESCVYIPCITAAIGCSCKSKVCYRN
>M.dentatusC0HKJ6.1(mden-N)
GTIPCGESCVYIPCLTSALGCSCKNKVCYRN
>M.dentatus_C0HKJ2.1(mden-J)
GSIPCGESCVYIPCISSIVGCACKSKVCYKN
>M.dentatus_C0HKI5.1(mden-B)
GLPICGETCFTGKCYTPGCTCSYPICKKN
>M.dentatus_C0HKJ0.1(mden-H)
GIPICGETCFFGKCNTPKCTCNKPLCYKN
>M.dentatus_C0HKI6.1(mden-C)
GKPICGETCFKGKCYTPGCTCSYPVCKKN
>M.dentatus_C0HKI8.1(mden-F)
GLPICGETCFFGKCNTPKCTCINPICYKN
>M.dentatus_C0HKI4.1(mden-A)
GIPTCGETCTLGTCNTPGCTCSWPICTKN
>V.biflora_P85246.1(vibi-H)
GLLPCAESCVYIPCLTTVIGCSCKSKVCYKN
>V.biflora_P85245.1(vibi-G)
GTFPCGESCVFIPCLTSAIGCSCKSKVCYKN
>V.biflora_P85244.1(vibi-F)
GTIPCGESCVFIPCLTSALGCSCKSKVCYKN
>V.biflora_B1NRR3.1(vitri-A)
AAFALPAFASFEKDVITPAALEAVLNRKAPLSNIMMENDAIVNVIANVKTVISNPVLEEALLKTNHGVNGIPCGESCVWIPCITSAIGCSCKSKVCYRNSLDN 
>V.biflora_B1NRR1.1(vibi-K)
AAFALPAFASFEKDVITPSVLEAVLNRKAPLSNIMMENDAILNVIANVKTVISNPVLEEALLKTNHGVNGIPCGESCVWIPCLTSAVGCPCKSKVCYRNSLDN
>V.biflora_B1NRR0.1(vibi-J)
AAFALPALATSFEKDFITHETVQEILKKVGSNSNGMLDEQTISALTGKTIISNPLLEEALFKSSNSINALGGTFPCGESCVWIPCISKVIGCACKSKVCYKNSLA
>V.biflora_B1NRQ9.1(vibi-I)
AAFALPAFASFEKDVITPAALEAVLNRKAPLSNIMMENDAILNVIANVKTVISNPVLEEALLKTNHGVNGIPCGESCVWIPCLTSTVGCSCKSKVCYRNSLDN
>V.biflora_B1NRQ8.(vibi-E)
AAFALPALASSFEKDVISFRAIQAVLEKRGLSKLEDDPVLSALAHTKTIISNPVIEEALLNGANLKAGNGIPCAESCVWIPCTVTALIGCGCSNKVCYNSLQTKY
>V.biflora__P85525.1(varv-A) 
GLPVCGETCVGGTCNTPGCSCSWPVCTRN
>V.biflora__P85242.1(vibi-D)
GLPVCGETCFGGRCNTPGCTCSYPICTRN
>V.biflora__P85241.1(vibi-C)
GLPVCGETCAFGSCYTPGCSCSWPVCTRN
>V.biflora__P85240.1(vibi-B)
GLPVCGETCFGGTCNTPGCTCSYPICTRN
>V.biflora__P85239.1(vibi-A)
GLPVCGETCFGGTCNTPGCSCSYPICTRN
>V.biflora__P85526.1(Cycloviolacin-O2)
GIPCGESCVWIPCISSAIGCSCKSKVCYRN
>V.odorata_ACI29316.1(Cyclotide c1 precursor)
MKMFIVLVLSAAFALPAAFATEQDVITLQAYEELLKNGAANGMTKTVISSPVLEEALVSYSKNKLGGLPVCGETCVGGTCNTPGCSCSWPVCTRNSLESTKSANPLLEEALTAFAKKGLGGLPVCGETCVGGTCNTPGCTCSWPVCTRNALETQKPNHLLEEALVAFAKKGNLGGLPVCGETCVGGTCNTPGCSCSWPVCTRNALAM
>M.latifolius_C0HK34.1(mela-7)
GLPTCGETCFKGKCYTPGCSCSYPICKKN
>M.latifolius_C0HK33.1(mela-6)
GLPTCGETCFKGKCYTPGCSCSYPICKKD
>M.latifolius_C0HK32.1(mela-5)
GSAIACGESCFKFKCYTPGCSCSYPICKKD
>M.latifolius_C0HK31.1(mela-4)
GKPICGETCFKGKCYTPGCTCSYPICKKN
>M.latifolius_C0HK30.1(mela-3)
GKPICGETCFKGKCYTPGCTCSYPICKKD
>M.latifolius_C0HK29.1(mela-2)
GKPTCGETCFKGKCYTPGCTCSYPLCKKD
>M.latifolius_C0HK28.1(mela-1)
GKYTCGETCFKGKCYTPGCTCSYPICKKD
>M.chathamicus_C0HK41.1(mech-7)
GIPICGETCTIGTCNTPGCTCSWPVCTRD
>M.chathamicus_C0HK40.1(mech-6)
GVIPCGESCVFIPCISSVVGCTCKNKVCYRN
>M.chathamicus_C0HK39.1(mech-5)
GVIPCGESCVFIPCISSVVGCTCKNKVCYRD
>M.chathamicus_C0HK38.1(mech-4)
GSIPCGESCVYIPCISSLLGCSCKSKVCYKD
>M.chathamicus_C0HK37.1(mech-3)
GLPTCGETCTLGKCNTPKCTCNWPICYKN
>M.chathamicus_C0HK36.1(mech-2)
GLPTCGETCTLGKCNTPKCTCNWPICYKD
>M.chathamicus_C0HK35.1(mech-1)
GVIPCGESCVFIPCINKKKCSCKNKVCYRD
>H.floribundus_P84648.1(Hyfl-B)
GSPIQCAETCFIGKCYTEELGCTCTAFLCMKN
>V.odorata_P58440.2(Cycloviolacin-O8)
MEMKNMVVGLFLIAAFALPALATNFEKDFITHETVQAILKKVGPSSNGMLDEQTISALTGKTIISNPVLEEALLTHSNSINALGGTLPCGESCVWIPCISSVVGCSCKSKVCYKNSLA
>V.odorata_P58443.2(Cycloviolacin-O11)
MEMKNMVVGLFLIAAFALPALATSFEKDFITHETVQAILKKVGPSSNGMLDEQAISALTGKTIISNPVLEEALLTHSNSINALGGTLPCGESCVWIPCISAVVGCSCKSKVCYKNSLA
>V.odorata_P58436.2(Cycloviolacin-04)
GIPCGESCVWIPCISSAIGCSCKNKVCYRN
>V.odorata_P85188.1(Cycloviolacin-25)
DIFCGETCAFIPCITHVPGTCSCKSKVCYFN
>V.odorata_P85183.1(Cycloviolacin-O20)
GIPCGESCVWIPCLTSAIGCSCKSKVCYRD
>V.odorata_P85182.1(Cycloviolacin-019)
GTLPCGESCVWIPCISSVVGCSCKSKVCYKD
>V.odorata_P85181.1(Cycloviolacin-018)
GIPCGESCVYIPCTVTALAGCKCKSKVCYN
>V.odorata_P85180.1(Cycloviolacin-017)
GIPCGESCVWIPCISAAIGCSCKNKVCYRN
>V.odorata_P58442.1(Cycloviolacin-010)
GIPCGESCVYIPCLTSAVGCSCKSKVCYRN
>V.odorata_P58441.1(Cycloviolacin-09)
GIPCGESCVWIPCLTSAVGCSCKSKVCYRN
>V.odorata_P58439.1(Cycloviolacin-07)
SIPCGESCVWIPCTITALAGCKCKSKVCYN
>V.odorata_P58438.1(Cycloviolacin-06)
GTLPCGESCVWIPCISAAVGCSCKSKVCYKN
>V.odorata_P58437.1(Cycloviolacin-05)
GTPCGESCVWIPCISSAVGCSCKNKVCYKN
>V.odorata_P58435.1(Cycloviolacin-03)
GIPCGESCVWIPCLTSAIGCSCKSKVCYRN
>V.odorata_P58434.1(Cycloviolacin-02)
GIPCGESCVWIPCISSAIGCSCKSKVCYRN
>V.odorata_P82230.2(Cycloviolacin-01)
GIPCAESCVYIPCTVTALLGCSCSNRVCYN
>V.odorata_1NBJ_A(Cycloviolacin-01)
XAESCVYIPCTVTALLGCSCSNRVCYNGIP
>V.odorata_1DF6_A(Cycloviolacin-01)
XCVYIPCTVTALLGCSCSNRVCYNGIPCAE
>V.odorata_P85187.1(Cycloviolacin-024)
GLPTCGETCFGGTCNTPGCTCDPWPVCTHN
>V.odorata_P85186.1(Cycloviolacin-023)
GLPTCGETCFGGTCNTPGCTCDSSWPICTHN
>V.odorata_P85185(Cycloviolacin-022)
GLPICGETCVGGTCNTPGCTCSWPVCTRN
>V.odorata_P85184(Cycloviolacin-021)
GLPVCGETCVTGSCYTPGCTCSWPVCTRN
>V.odorata_P85179(Cycloviolacin-016)
GLPCGETCFTGKCYTPGCSCSYPICKKIN
>V.odorata_P85178(Cycloviolacin-015)
GLVPCGETCFTGKCYTPGCSCSYPICKKN
>V.odorata_P85177(Cycloviolacin-014)
GSIPACGESCFKGKCYTPGCSCSKYPLCAKN
>V.odorata_P83836(Cycloviolacin-012)
GLPICGETCVGGTCNTPGCSCSWPVCTRN
>V.odorata_Q5USN8(Cycloviolacin-013)
MDAKKMFVALVLIATFALPSLATFEKDFITPETIQAILKKSAPLSNIMLEEDVINALLKSKTVISNPIIEEAFLKNSNGLNGIPCGESCVWIPCISAAIGCSCKSKVCYRNSLDN
>V.odorata_P83839(Vodo peptide M)
GAPICGESCFTGKCYTVQCSCSWPVCTRN
>V.odorata_P83838.1(Vodo peptide N)
GLPVCGETCTLGKCYTAGCSCSWPVCYRN
>V.odorata_Q2HY54.1(Violacin-A)
MDAQKMKMVIGLVLVATTAFALMIPAASAVDDFITRRAYDNLVKSGAIKDIPVMAKTIISNPVLEEGMLTYYTNKKLGDSAISCGETCFKFKCYTPRCSCSYPVCK
>V.inconspicua_C0HKK2(vinc-B)
GSIPACGESCFKGKCYTPGCTCSKYPLCAKN
>V.inconspicua_C0HKK1(vinc-A)
GIPVCGETCTLGTCYTAGCSCSWPVCTRN
>M.angustifolius_C0HKI3(mang-A)
GFPTCGETCTLGTCNTPGCTCSWPICTRD
>M.obovatus_C0HKJ7(mobo-A)
GFPTCGETCTLGTCNTPGCTCSWPICTRN
>M.obovatus_C0HKJ8(mobo-B)
GKPICGETCAKGKCYTPKCTCNWPICYKN
>L.triandra_C0HKI2(ltri-A)
GVACGESCVYLPCFTVGCTCTSSQCFKN
>L.cymosa_P84640(Cycloviolin-D)
GFPCGESCVFIPCISAAIGCSCKNKVCYRN
>L.cymosa_P84639(Cycloviolin-C)
GIPCGESCVFIPCLTTVAGCSCKNKVCYRN
>L.cymosa_P84637(Cycloviolin-A)
GVIPCGESCVFIPCISAAIGCSCKNKVCYRN
>L.cymosa_P84638(Cycloviolin-B)
GTACGESCYVLPCFTVGCTCTSSQCFKN
>V.hederacea_P85233(Cycloviolacin-H2)
SAIACGESCVYIPCFIPGCSCRNRVCYLN
>V.hederacea_P58433(Cycloviolacin-H1)
GIPCGESCVYIPCLTSAIGCSCKSKVCYRN
>V.hederacea_P85234(Cycloviolacin-H4)
GIPCAESCVWIPCTVTALLGCSCSNNVCYN
>V.hederacea_P85232(Cycloviolacin-H3)
GLPVCGETCFGGTCNTPGCICDPWPVCTRN
>V.arvensis_P83840.1(Vitri peptide A)
GIPCGESCVWIPCITSAIGCSCKSKVCYRN
>G.pauciflorum_ACZ95475(thioredoxin-like protein)
YAPWCGHCRAGRQDFSQEKETGETNFKKIVGYMKIFVML
>G.blakeanum_ACZ95474(disulfide isomerase-like protein)
YAPWCGHCKKLAPILDEVASSYQSDADVVIAKLDATANDYPTDTFEVQGVPHHVLQVCQWETWCSMMAIGRKRQSLSSLKRTGDKVAQQEQEPAKG
>G.blakeanum_ACZ95473(disulfide isomerase)
YAPWCGHCKKLAPILDEVASSYQSDADVVIAKLDATANDYPTDTFEVQGYPTMYFRSASGNLVQYDGDRTKEAIIEFIEKNRDKVAQQEQEPAKDEL
>V.biflora_ACZ95472(thioredoxin-like protein)
YAPWCGHCRIIHPVIDELAKQFAGKLKCYKVNTDEYKNIPTEYGIRSIPTVLIFKGGEKKDAVIGAVPKTTLTSSIEKFL
>V.biflora_ACZ95471(thioredoxin-like protein)
YAPWCGHCRLIHPEVAELSAQYAGKLKSFKMNTDESPSTANKYGIRSIPTIMIFVNGEKKDAVIGSVPRTTLISAIGKFI
>V.biflora_ACZ95470(disulfide isomerase-like protein)
YAPWCGHCKSLAPTYEKVAAAFKSEEDVAIANLDADKHKDLAEKYGVSGYPTLKFFPKNNKAGEDYDGGRDLDDFVAFINEKSGTSRDGKGQLTSKAGIIESLDALVKEFVAASNDEKKAVFSRLEEEVGKLQGSAARYGKIYIKAAKSSMEKGAGYAKKEIERLQRILEKSISAAKGDEFTLKKNILSAFA
>V.biflora_ACZ95469(thioredoxin-like protein)
YAPWCGHCRIIPPRVIDELAKQLAGKLKCYKVNTDECKNIPTEYGIRSIPTVLIFKGGEKKDAVIGAVPKTTINIQHREVLVKFVSGE
>V.arvensis_P83835(Varv E)
GLPICGETCVGGTCNTPGCSCSWPVCTRN
>V.arvensis_P58453(Varv H)
GLPVCGETCFGGTCNTPGCSCETWPVCSRN
>V.arvensis_P58452(Varv G)
GVPVCGETCFGGTCNTPGCSCDPWPVCSRN
>V.arvensis_P58449(Varv D)
GLPICGETCVGGSCNTPGCSCSWPVCTRN
>V.arvensis_P58448(Varv C)
GVPICGETCVGGTCNTPGCSCSWPVCTRN
>V.arvensis_P58446(Varv A)
GLPVCGETCVGGTCNTPGCSCSWPVCTRN
>V.arvensis_P58451(Varv F)
GVPICGETCTLGTCYTAGCSCSWPVCTRN
>V.arvensis_P58447(Varv B)
GLPVCGETCFGGTCNTPGCSCDPWPMCSRN
>V.arvensis_P0C589(Tricyclon-A)
MKTMASFVLVLVAAFALPAAFASLETKDVITRAAYEKLVESGAIQGITMTKTIISNPILEEALVAHFNRKLGGGTIFDCGESCFLGTCYTKGCSCGEWKLCYGTNSLPESNNEKAMVASLEKDVITRAAYENLVNSGAIQGITMTKTIISNPILEEALVSHFNRKLGGGTIFDCGESCFLGTCYTKGCSCGEWKLCYGENSLAI
>V.tricolor_AJR10105.1
AAFALPAKSQGYNAGKSKKYVQYKNKQPANENGRGNTQAFPPCPYCKKTNHSQKRCWWRPDIKCNKCKQLGHMEKICKSFQGEANAVQDPQDGEQMFVASCFTIGSSTESWLIDSGCTNHMTYDRELFKELHQTTVSRVRIGNGVYINVEGKGTIAIEGSTGLKLISDVLYVPEIDQNLLSVPQLLEKGYKVLFEDKSCIIKDAEGQDLFKVKMKNKCFALDLLQEVRML
>V.spWO2006041917_CAN08378.1
MESYKKMQLVGFVLLAAFALPALASSFEKDVISAHAIQAVLEKRGLSKLEDDPVLSALASTKTIISNPVIEEALLSGASLEAGNKIPCGESCVYIGCTLTALAGCKCKNKVCYNSLQTKY
>V.spWO2005118628_CAJ56194.1
GIPCGESCVWIPCISAAIGCSCKSKVCYRN
>V.spWO2005118628_CAJ56226.1
MDAKKMFLALVLIATFAVIPSFATFEKDFITREAIQAILKKSAPLSNIMLEEDVMNVLIKSKTVISNPVIEEALLKSSNGLNGIPCGESCVWIPCISAAIGCSCKNKVCYRNSLDI
>P.rigida_AOG74778.1(parigidin-br2 precursor)
MAKFANHLFLFFLIASFVMLEVHSYDGMQDLGKRLLMNVDSLGGGSVPCGESCVFIPCLTSLAGCSCKNKVCYYNGLNPEKI
>C.chartacea_AFH57352(chassatide C2)
MAKFANYLMLFLLVASLVMLEAQSSDTIKVPDLGKRLLMNRDPNGIPCAESCVWIPCTITALMGCSCKNNVCYNNEL
>O.affinis_ADJ17469(Oak6)
KSLVLCLLLAAFVGAFGAELSEADKANVVNEIAANIQREILKGVKTSETTLTMFLKEMQLKGLPVCGETCFGGTCNTPGCACDPWPVCTRNGLPRRAGVKSSETTLTMFLKEMQLKGLPICGETCFGGTCNTPGCICDPWPVCTRDGLPDVAA
>vpub_v1.1_g_00105
MDAKKMFLALVLIATFAVIPSFATFEKDFIFPETIQAILKKSTPLSNIMLEEGVMNALIKSKTVISNP
>vpub_v1.1_g_00393
GTTSKAHICGCGEAPLSNMMMEDEDAVLKIISTTKTIISNPVLEEAFLNNYNSANGIPCDDDADDDNQEEAMCICL
>vpub_v1.1_g_01733
MKMFVGLVLFAAFALPAAFAAQQDVITLQAYEELLKNGAAYGMTKTVISNPVLEEALVSYSRDKLGGLSTCGETCFIIPRCHNPGCVCTRESVHQSLSRTLLGALRIHLVSFSNDYLKYCAILFKRHLIVSKCSE
>vpub_v1.1_g_01933
MDAKKMMVGLVLFAAFALPAFATQDVITRDAYEALIKSGAAHGLTKTVISSPILEETLVSYANKKLGGLPICGETCVGGTCNTPGCSCSWPVCTRNSLEAEKSNPLLEEALVTFAKKGLGGLPICGETCVGGTCNTPGCSCSWPVCTRNYLETKTSNPLLEEALLAFAKKGNLGGLPICGETCVGGTCNTPGCSCSWPRQDSVRSEASPHGNAPNTSKRSN
>vpub_v1.1_g_02220
MKMFIVLVLSVAFALPAAFATEQDVITLQAYEGLLKSGNANGMTKTVISSPVLEEALVSYSKNKLGGVPVCGETCVGGTCNTPGCTCTWPVCSRNSLESTKSANPLLEEAFTAFAKKGLGGLPVCGETCTLGTCNTPGCSCSWPICMRNSLESTKSANPLLEEALVAFAKKGNLGGVPICGETCVGGTCNTPGCTCTWPVCSKNSLAM
>vpub_v1.1_g_02636
MKMMVGLMVVAAAAVFALMIPASSAVVLELEDVITRDAYENLVERGAMNGIAMTKTVISNPILEEALVTYSKNKLGGGTIFNCGETCLMGTCYTPGCLCDQKWR
>vpub_v1.1_g_03183
MERAKAQTTFASLEKDVITADAIRALTKSSNKFPADAVNELVKSKTLVSKIELEEAFQLEDANGVTALGIPCGESCVWIPCFSSLIGCRCRSKVCYR
>vpub_v1.1_g_03752
FALPAAFAAGHHDVITLKAYEELLKSGDGMTSKTVISSPVLEEALVSYSKNKLGGLPVCGETCVGGTCNTPGCSCSWPVCTRNSLAHTKSAAHPLLEEALVAFVKKENGLGGLPVCGETCVGGTCNTPGCTCSWPVCTRNSL
>vpub_v1.1_g_04189
MDAKKMIVCLALFAAFALPAFATQDVITSNAYEALLKSGAAHGKTKTVIYSPFLEETLVSYSQKKLGGLPVCGETCFGGTCYTPGCSCSYPVCTRNSLESKKFNPLLEEALLAFDKKGNLGGLPICGETCFGGTCYTPGCSCSFPICMRNSLAIRGGYTCL
>vpub_v1.1_g_04572
MKMFVGLVLFAAFALPAAFAAQQDVITLQAYEELLKNGAANGMTKTVISSPVLEEALISYSKNKLGGLPICEETCVGGTCNTPGCSCSWPVYTRNSLESTKSANPLLEEALTAFAKKPETQKPNPLLEEALVAFAKKDTPQTVFLNEENALPIDSGNDVWYYDTRASNHMSGAKQMFASLDETVKGTIKFGDGSEVKIQGKGAVMFQCKNKEQNCQQVHGGSDLTAHGGYEAYFASCADDPELMGFSDSDLAGDTDDRKNTT
>vpub_v1.1_g_05090
DVITPAALEAILNSKGPLSNTEKDAIMNVIANVKTVISNPVLEEALLKTNHGVNGVFCGETCSVVPCFSSSRGCGCTYMGGGMVCVKNSLDN
>vpub_v1.1_g_05321
MRDVYWLDSFKLRNKRDGMESSSKKKMVVVVILVLVAAAAFTLMPSAVAFAEKDVIGGQAIEAVLQKRGVSRVEDDPMVSALVRGKTIISNPVLEEALLKIPSHGADNWLVSCGESCVWLPCGVSVLFGCKCNNKVCYKNALPNSIHNYT
>vpub_v1.1_g_05952
MWAHAVATSIHYVACNLTFASLKKDVITADAVRALTKSSNKFPADAINTLVKSKTLVSKIELEEAFQLQDANGVTALGIPCGESCVWIPCISGHIGCRCRSKVCYR
>vpub_v1.1_g_06092
MDAKKMFLALVLIATFAVIPSFATFEKDFITREAIQAILKKSAPLSNIMLEEDVMNALIKSKTVISNPIIEEALLKSSNGLNGMPCGESCVWIPCISAAVGCSCKSKVCYRNSLDI
>vpub_v1.1_g_06147
MDAKQMFLALVLIATFAVIPSFATFEKDFITPEAIQAILKRSAPLSNIMLEEDVISALIKSKTVISNPVIKEALFKNSNGTMLAHGTLLNLDI
>vpub_v1.1_g_07197
MLEEDVMNALIKSKTVITNSVIEKALLKNSNGLNGVFCGETCAHIPCLTGLGCSCTDKACYRNSLDI
>vpub_v1.1_g_07214
MRDVYWLDSFKLRNKRDGMESSSKKKMVVVVILVLVAAAAFTLMPSAVAFAEKDVIGGQAIEAVLQKRGVSRVEDDPMVSALVRGKTIISNPVLEEALLKIPSHGADNWLVSCGESCVWLPCGVSVLFGCKCNNKVCYKNALPNSIHNYT
>vpub_v1.1_g_08591
MEMKNMVVGLLLIAAFALPALATSLEKDYITHEAVQEALKRANSNGMLDEKSINALTSKTVISKQLFEEAFLRDSNRIQNLGQFTEPC
>vpub_v1.1_g_09195
MKMFIVLVLSAAFALPAAFATEQDAITLQAYEGLLKSGDANGMTKTVISSPVLEEALTALARKGLGGTLCDVVPCSRGICPAGCFCNANIRCVRNSLA
>vpub_v1.1_g_09865
MKMFIVLVLSAAFALPAAFATQQDVITLQAYEGLLKSGDANGMTKTVISSPVLEEALVSYSKNKLGGFPVCGETCFTSKCNTPGCTCSYAVCTLNSLESTKSANPLLEEALTAFAKKGL
>vpub_v1.1_g_10168
MKMFVALVLFSAFALPAAFAAGHHDVITLKAYEELLKSGDGMTSKTVISSPVLEEALVSYSKNKLGGLPVCGETCVGGTCNTPGCSCSWPVCTRNSLAHTKSAAHPLLEEALVAFVKKENGLGGLPVCGETCVGGTCNTPGCTCSWPVCTRNSLGGGYTCFVTYTYDENVRHASSLVPLPSAFNK
>vpub_v1.1_g_10357
MKGQVMVVDGWIVVMDCKRHILQEKFSSHQDIQSEEALNIASSKKGNLDGLPVRGESCFTGTCYTRGCSCDWPICKRYALAN
>vpub_v1.1_g_11081
MPQELPGFYYDAEKNRYFPLKGPIPGSQRSRAASSTSNPQKPSFKHTQATDISQKTRVRISKLLQGRELYGKVTAFNKGKCNFMEEVLKIRASEPVVWKYQHTKTIGDGALELIHVDKNTLEGQSAVDVLVSGGVNGYLSFFEVGKVGQRFDNDGIKCLPDRVWPVNEEDNTECCKAPGHIWRAAGVPLEMPSSISCIKLCGRHSPSVDSGFNNQRALITTLGGSVCILNLMGAFDFNSITSMRRSMHEVASFSCTIWTADCNPNASQVVIGTNRGAALVSMETGAATWVCQSKSDVLAQTFDQSGNTVLCGLRNGAIVSVDIRENSNRLIKHMLPYSPMGSKCQNSGKKWFEVKGNIHPSSTTYMPSSVCSLVSLQSYDQYFLASSMDGSIKLYDHRMIKRGSMQSYEGHVNSHTRLQLEVDHSERFLMSGGEDCFLRVWSIKSGKLLFAEKFSDSILSTAMFGLVLLIIITTFVQAKPKEDFIAIEAVRSLAESNKLSSSAIIDILEHKRVVSKVELEETFSFLNEVVGEFCLETCMTIPCYSRAGGCGCNNKWGVCVRLILQAMHGAKNYIVDLTNVATRVTMVVFGVQSWGPNQHFSKNPVPKLEISSILALQDFGPSSTKWCGKR
>vpub_v1.1_g_11510
MDAKKMMVGLVLFAAFALPAFATEDVITRDAYEALLKSGDADDLTKTVISSSILEETLVSYANKKLGGLPICGETSGLFARENLEAEKSNPLLEEALVTFAKKGLRGLPICVETCVAGTYGSPGRSCNWPICARNSLETTKTSNPLLEEALLAFAKKGNLGGLPICGETCVGGTCNTPGCSCSWPVCTWPVCTRNALAN
>vpub_v1.1_g_12341
FALPAAFATEQDXXXXQAYEGLLKSGDANGMTKTVISSPVLEETLVSFSKNKLGGLPVCGETCVGGTCNTPGCTCTWPVCTRNSLESTKSANPLLEEALTAFGGLGGGASCKQDCPSGYCTNKGCICDNSKPTRKCVKNSLAM
>vpub_v1.1_g_14656
FASLEKDVITADAIRALTKSSNKFPADAVNELVKSKTLVSKIELEEAFQLEDANGVTALGIPCGESCVWIPCFSSLIGCRCRSKVCYR
>vpub_v1.1_g_16595
MDAKKMIVCLALFAAFALPAFATQDVITSKAYEALLKSGAAHGMTKTVISSPILEESLVSHSPKKLGGLPICGETCFGGRCNTPGCSCSFPD
>vpub_v1.1_g_17131
MWAHAVAASIHYVACNLSAIRMETKMNLGMLVGLVLIANFALATFASLEKDVITADAIRALTKSSNKFSADAINALVKSKTLVSKIELEEAFQLQDANGVTAFSIPCGESCVWIPCFTSVIGCSCKSKVCYR
>vpub_v1.1_g_17446
MKMSIVLVLSAAFALSAAFATAQDVITLQAYEALLKSGHANGMTKTVISSPVLEETLVSYSKKNLGGLPVCGETCVGGTCNTPGCSCSWPMCTRNSLESTKSLVTEKSHPLLEEALLAFAKK
>vpub_v1.1_g_17934
MMKMFVAIVLFAAFALPAVSASAHQDVITLKAYEELLKSGASTDGMTKSVIWSPLLKEALVSYSRNKLGGLPVCGETCVGGTCNTPGCSCSWPVCTRNSLERTNSAAAHPLLEEALVAFAKKGNLGGKVTCGGETCFTGKCNAKGCDCKNWPLCTRNSLDIVEFFPNAYALVLKTV
>vpub_v1.1_g_18184
MVVGLLVIAAFALPALATIFEKDFITHETVQAILKKVGPGSNGMLDEQTISALTGKTIVSNQFLEEALLKHSNSISALGGTIPC
>vpub_v1.1_g_18720
MKMFVALVLFAAFALPAAFAAQQDFITLKAYEELLKNGGMTKKTVISNPVLEEALFPFSENKLGGRRCGENCYSGSCDTPGCSCAVLPSIPLPIPVCFKNSLESTKSANPLLEEPLTAFAKKGEY
>vpub_v1.1_g_18836
METKKMNLGMLVGLVLIAIFALATFASLEKDVITADAIRALTNSSNKFPADAINALVKSKTLVSKIELQKAFQLQDANGVTAGIPCGSAC
>vpub_v1.1_g_19960
MDAKNMFVGLVLIATFPLPSLATFERDVITPEAIQAILEQKKTNPNSNYMLSDSEDAVNALTGKIVIADNLVLEEALKMMRSNNVKFDGIHCAETCLWRPCRTAVIGGIRKLALRVNSQSERMTKDLSTRLCWTAWFTLG
>vpub_v1.1_g_20166
EVIQFWSVIEEVTSVSIESITFSKGTKEGRGDTTIWTDSPLDRAQKAKMNYLEAYNEAAALASNEEEEKKSSADADLVDKYNKSKRSKSLMQKHREEASHKEEIEAATRKRRVERANILGSLGTVIAAFALPALANKRFEGDGKKDYMSYDAAVEAVFGKMVINNPVIEEALRAHLGGNFCLETCYVFGCDWPGCFCSGRKCYVNDLASN
>vpub_v1.1_g_20940
MRDVYWLDSFKLRNKRDGMESSSKKKMVVVVILVLVAAAAFTLMPSAVAFAEKDVIGGQAIEAVLQKRGVSRVEDDPMVSALVRGKTIISNPVLEEALLKIPSHGADNWLVSCGESCVWLPCGVSVLFGCKCNNKVCYKNALPNSIHNYT
>vpub_v1.1_g_21623
MDAKKMFLALVLIATFAVIPSLATFEKDFISPEAIQAILNKSPPLSDAAMNALLKNKIIISNPVIEEALFKN
>vpub_v1.1_g_23339
NMDAKKMLVALVLIATFEKDFITPQAVRAILEKANANAMPSEDAINALTGKTLISNIVLEEALLKNLNNVNGVVPCGESCVWIPCITAAIGCSCKSKVC
>vpub_v1.1_g_23523
FALPAAFAAEQDVITLQAYEGLLKSGDANGMTKTVISSPVLEEALVSYSKNKLGGLPICGETCFGGTCNTPGCSCSYPICTRNSLESTKSANPLLEEALTAFAKKGLGGLPICGETCVGGTCNTPGCICSWPVCTRNSLVTEKSNPLLEEALVAFAKKGNLDGVSFCGDLSCVGGRCPIPGCHCNWPICTKYSLAM
>vpub_v1.1_g_24210
MDAKKMFIALVLIATFAVIPSFATFEKDFITPEAIQAILKKSAPHSHIMLEEDVMNALIKSKTVITNSVIEKALLKNSN
>vpub_v1.1_g_24289
DFITHETVQAILKKVGPSSNGMLDEQAISALTGKTIISNPVLEEALLTHSNSINALGGTFPCGESCVFIPCITSVIGCSCKSKVCYKNSLA
>vpub_v1.1_g_24917
MASQKIVVAFLLIAAFALPAFASFEKDVITPAALEAVLNRKAPLSNIMLENDAIVNVIANVKTVISNPVLEEALLKTNHGVNGFCGETCILIPCITSLIGCSCNTRSVCWKK
>vpub_v1.1_g_25249
MKMFVALVLFSAFALPAAFAAGHHDVITLKAYEELLKSGDGMTSKTVISSPVLEEALVSYSKNKLGGLPVCGETCVGGTCNTPGCSCSWPVCTRNSLAHTKSAAHPLLEEALVAFVKKENGLGGLPVCGETCVGGTCNTPGCTCSWPVCTRNSLGGGYTCFVTYTYDENVRHASSLVPLPSAFNK
>vpub_v1.1_g_25457
MKMVVGLVVVLVAAFALPSAFASSEIKDVITREXXEKLVNSGAMEGVAMTKTIISNPVLEEALVTYSKNILGGSILNCGETCLMDTCYTSGCSCGAYRVCTKNSLQGNNNKAVKDVITRDAYENLVKSGAIEGIAMTKTIVSNSVLEEALVTYSKNKLGGSIFNCG
>vpub_v1.1_g_25492
MDAKKMFLALVLIATFAVIPSFATFEKDFITPETIQAILKKSAPLSNIMLEEGVMNALIKSKTVISNPVIEEALLNNLNNLNGVLPC
>vpub_v1.1_g_27295
SFEKDVITPAALEAVLNRKAPLSNIMLENDAIVNVIANVKTVISNPVLEEALLKTNHGVNGFCGETCILIPCITSLIGCSCNTRSVCWKK
>vpub_v1.1_g_28166
MKMFVGLVLFAAFALPATFAAQQDFITLKAYEELLKNGAANGMTKKTVISNPVLEEALFSFSENKLGGNPCGETCFSFSCDNPGCYCGIIGIIPGCLKNSLESTKSANPLLA
>vpub_v1.1_g_28761
FASLEKDVITADAIRALTKSSNKFPADAVNELVKSKTLVSKIELEEAFQLEDANGVTALGIPCGESCVWIPCFSSLIGCRCRSKVCYR
>vpub_v1.1_g_29524
MKKRNRHTLVQMKFCLPLFKAKRESKRWNGVTSGAAESGGRRLWCEAGTVFCSANASVPGTTLTPFPILATSFEKDFITHETVLAILKKVGPNSNGMLDEQTISALTGKTIISNPVLEEALLKHSNSINALGGIPCGETCVWFRCFDPACHCDPRSRLCMNSLA
>vpub_v1.1_g_29737
MDAKKMFLALVLIATFAVIPSFATFEKDFISAEAIQAVLKKIAPLSNEEDVINAIVKSKTVISNPVIEEALLKDSNGEQFAD
>vpub_v1.1_g_29858
FALPAAFAAQQDVITLQAYEELLKNGAAYGMTKTVISNPVLEEALVSYSRDKLGGVDPCGETCELLPCYNPGCSCRFFLCVRNSLESTKSANPLLEEALTAGVTAFAEEGLGEKLRFWDCNQNCGQGKPCRDSRCFCTAFGSCIRDNPAIGEEAIHARDM
>vpub_v1.1_g_30118
IPSFANFEKDFITPEAIQAILKESSPLSNIMLEEGVINALIKSKIVISNPVIEEALLKNLNNLNGVIPCGESCVFIPCISSVVGCSCKNKVCYRNSLDI
>vpub_v1.1_g_30422
MDAKKMFLALVLIATFAVIPSFATFEKDFITPEAIQAILKKSAPLSNIMLEEGVMSALIKSKTVISNPVIEEALLKNSNGLNGIPC
>vpub_v1.1_g_30518
FEKYFITTEAVRVILKKTNANVMPSEDAINALGGKTVISNIVLEEALLKNLDNGLNGIPCGESCVWIPRITGAIGCSCKSNVCYRNSLDM
>vpub_v1.1_g_30858
PVLEEALVTYSKNKLGGSIFNCGESCILGTCYTPGCSCVWGACSKNSLQGNNNKAVKDVITRDAYENLVKSGAIEGIAMTKTIVSNPVLEEALVTYSKNKLGGSIFNCGESCILGTCYTPGCSCVWGACSKNSLAAN
>vpub_v1.1_g_32467
MKMFVGLVLFAAFALPAAFAAQQDVITLQAYEELLKNGAAYGMTKTVISNPVLEEALVSYSRDKLGGVTPCGETCHNFPCRSPGCTCNRESVCVRNSLESTKSANPLLEEALTAYAKKGLGGSSCGERCPQGWCRTVGCTCYLHDLVCVRNSLAIN
>vpub_v1.1_g_34339
MKMXVGLVLFAAFALPAAFAAQQDVITLQAYEDLLMNGVANGMTKTVISSPVLEEALVSFSKNKLGGLPVCGETCVGGTCNTPGCSCSWPVCTRNSLESTKSANPLLEEAL
>vpub_v1.1_g_34576
MDAKKMFLALVLIATFAVIPSFATFEKDFITPEAIQSILKESSPLSNMEDVMNAIIKSKTVISNPVFEEAFLKNSNGFICGETCRWGPCTASVLGVRCLCKNADLCY
>vpub_v1.1_g_34819
MDAEKMFLALVLIATFAVIPSFATFEKDFITPEAIQATLKKSAPLSNIMLEEDVMSATIKSKT
>vpub_v1.1_g_35758
SFEKDVITPAALEAVLNRKAPLSNIMLENDAIVNVIANVKTVISNPVLEEALLKTNHGVNGFCGETCILIPCITSLIGCSCNTRSVCWKK
>vpub_v1.1_g_36342
MKGQVMVVDGWIVVMDCKRHILQEKFSSHQDIQSEEALNIASSKKGNLDGLPVRGESCFTGTCYTRGCSCDWPICKRYALAN
>vpub_v1.1_g_36613
MKMFIVLVLSAAFALPAAFATEQDVITLQAYEGLLKNGDVNGMTKTVISNPVLEEALVFYAENKLGGSFCGETCRDLQCGNPKCHCNYPMCTLNSLESTKSANPLLEEALTAFARKGLA
>vpub_v1.1_g_08374
MAMKNCFHVSTVLCPTRGTSVVVQSYHPCGVSVEKLNFRGLNPSSLPSGRAHSPSSLLANLSRRSRTHKPLTVCKAAVDEVLAVTDASWDKLVVGNETPVLVEFWAPWCGPCRMIAPIIKELAKEYAGKVACYTVNTDDCPNIATTYGIRSIPTVLFFKKGEKKESVIGAVPKGTLSSAIEKYIDA
>vpub_v1.1_g_12025
MASSLVPVLLCVFAFCLAPTISAEDSASKEYVLTLDHSNFSDTIAKHDFIVVKFYAPWCGHCKNLAPEKAASILSSHDPQIVLAKVDANDEFNKDLADQYVVKGSHALKILRKGGKAIQDYKGPSDVEGLKQSVPASVELKSTDDASTLIGDKKIVIVGVFPKLSGQEFENFIALAEKLRSEYEFGHTSDAKHLPRRESSVSGPLVRLFKPFDELFVDSKDFNVDALEKFVEESSTPTVTVYDNDCSNRPFVSKYFNSPDAKVPIWDHDNQSCMQMMAMLFTNFSNEVTDSLKPKFHEVAEKYKGEGIVFLMGDVEATQRAFQYFGVREDQAPLIIIQTANGQKYLKPNVEADQVAPWLKDYKDGKVTPFRKSEPIPEVNDGPVKVVVADSLQQIVFNSGKNGMRQPSLFSSFALCLQGSTPSGGK
>vpub_v1.1_g_12074
MSSLHSLRSSNCDSIRFINMSTATIALLLLLFFFFSSLLLHPSSITSTDVVVLGDNNFSDFVTRNRYVMLNFHASWCKHCNRLAPEYAAAATMLKGEAVLAKIDANRGNELIYRYKISGYPTMLLLVDGAQKAVYTGSRTRDAIATWVRQKMGEHILSENHQVQQELSLEPDNILNINHIQDESLGFLFTNRENEIII
>vpub_v1.1_g_13255
MAIRSWILGFAVLALAVVAAADSGAEEEVEQVNEEFVVSLDHSNFTDFIEKQDFVLVEFYAPWCGACKSLTPQYAKAASALSDHDPPIVLAKFDAVEESNKEIAAKYGIKKYPTLKILTRGGKITLDFKGTRDTDGIVSYVKKHRGPASTEIGSTDEATSLINANKIVVVSTAQLHSLLVSSSCLVGVFPEFSGQEFENFVTLAERLRVDYEFAHTSDAKHLPRGDSSVTGPFVRLFKPFDELFSDTKDFKVDALFNFVEDSSTPSVTIFDKDPGNSVFITKYVQRPDSKVYTQFGLY
>vpub_v1.1_g_13940
MDAIVSNSTSLLIASLPPFPPLTTTHLTTLPATTTVQKRRRRRLQLSRKSVSSFPPPPPLLTVRKTAITCGAIPEINQSQFSDTVLKSDRPVLVEFVAAWCGPCRLISPAMESVAQEYSDRLVVVKIDCDANPQLIEEYKVYGLPSLILFKNGQEVSGSRREGAITKAKLKEYLDSLLEAISVA
>vpub_v1.1_g_14613
MDAAQIAELKHFIDECKSNPSILHSPSLSFFKTYLRSLGAQIPPASGSMGDPTVEVTEENQDAAQSEKSKAMAAISEGNLSKAIDHLTEAITMNPTSAILYATRASVFVKENKPNAAIRDADAALEINPDSAKGYKIRGMAKALLGQWEDTARDLHMASKLDFDEEIGSVLKKVEPNVHKIEEHRKKYQRLQKEREQKKAERQRQQQAQAQEQEILSSLKDGQVISIHSVSELETKTNAVKKTSRLAVLYFTATWCGPCRMMSPLFTSLAAKFTKVVFLKVDIDEARDVAARWNVSSVPTFFFLKNGKEIDKVVGGDKIALERKIEQHAC
>vpub_v1.1_g_18819
MATVLESLVVPRSSALSRPTLSPITASSSSISHRPLKFPQAHGLKLSLTSTLSSPVPRSKFGRRARIICEAQDTAVEVASIKEDSWKSLVLESDLPVLVEFWAPWCGPCRIIHPVIDELAKQYAGKLKCYKVNTDECKNIPTEYGIRSIPTVLIFKGGDKKDAVIGAVPKTTLTSSIEKFL
>vpub_v1.1_g_22182
MEKYNQIWLVFGTIALFVVSALADDVVVLTEENFEKEVGQDRAALVEFYAPWCGHCKKLAPEYEKLGSSFKKAKSVLIGKVDCDEHKSVCGKYGVSGYPTLQWFPKGSLEPRKYEGPRTAEALAEFVNSEGGTNVKLASVPSSVVILTDENFSEVVLNEKKDVLVEFYAPWCGHCKSLAPTYEKVAAAFKSEEDVVIANLDADKHKDLAEKYGVSGYPTLKFFPKNNKAGEDYDGGRDLDDFVAFINEKSGTSRDGKGQLTSKAGIIESLDALVKEFVAASNDEKKAVFSRLEEEVGKLQGSAARYGKIYIKAAKSSMEKGAGYAKKEIERLQRILEKSISAAKGDEFTLKKNILSAFA
>vpub_v1.1_g_24167
MSYRLILLLALTTLLLSSRFTPSLSKPQNDDKAAASDDNDDEDLSFLEEDDAGHGSHRAGGGHQFHDSDGFDDEEDDGDVDDFENYSGFDETGSDDQYKVPEVDDKDVVVLKERNFTDVIENNKFVMVEFYAPWCGHCQSLAPEYAAAATELKGEGVVLAKVDATEENELAQEYDVQGFPTVLFFADGVHKPYPGQRTKEGIVSWIKKKTGPGIANITTVEDAERILTSEAKVVLGYLNSLVGSESDELAAASRLEDDVSFYQTVNADVAKLFHLDSEVKRPALVMVKKEAEKVVHFDGKFSKSEMSEFVFGNKLPLVTIFTRESAPAIFESPIKKQVHVLSIYWGFESKHCFYGPLMLFVVVKFLIPQLLLFASSNDSEKVLTLFQDAAKLFKGKLIFVYVELDNEDYGKPVAEYFGITGTGPKVLGYTGNEDGKKFVFDGEVTFDKIKAFGEDFIKDNLKPFFKSDPIPETNDGDVKVVVGDNFDEIVLDESKDVLLEIYAPWCGHCQSLEPTYNKLAKHLRDIDSLVIAKMDGTTNEHPRAKSDGFPTLLFFPAGNKSFDPITMDTDRTVVAFYKFLKKNAAIPFKLQKPASATKPETKPETSESKGSDEKSGSSSSEAKDEL
>vpub_v1.1_g_26700
MRKVLNSNGVVLVEFFAPWCGHCKALTPIWEKAASVLKGVATVAALDADAHQSLAQEYGIRGFPTIKVFVPGKPPVDYQGARDVKPIADFAYKEIKALLKDRLAGKSSGGSSEKSEAPSSSVELNSRNFDELVLKSKELWIVEFFAPWCGHCKKLAPEWRKAANNLQGKVKLGHVDCDTDKSLMSRFNVQGFPTILVFGADKDTPIPYEGARTASGIESFALEQLETNVAPPEVTELTSPDVLEEKCGSAAICFVAFLPDILDSKAEGRNKYLQQLLSVAEKFKRSPYRQVDYISFFNYVWAAAGKQPDLEKRVGVGGYGYPALVALNIKKGAYAPLKSAFELEHVIEFVKEAGRGGKGNLPLQGTPEIVKTEPWDGKDGEIIEEDEFSLEDLMGDDAAVTKDEL
>vpub_v1.1_g_27274
MAFSSSLSASTVLSSSSLITRSHHNFSNLTSFSCVPFPARLNRLHPQLRTPRISSPSTSRPPLLVFAAKKQTFNSIDELLQNSDKAVLVDFYATWCGPCQLMGPVLNEVGAVLKDTIQVVKIDTEKYPTIADKYRIEALPTFILFKDGEPYDRFEGALTKDQLIQRIENSLKGCAC
>vpub_v1.1_g_27293
PIVTDATWESLVLKAEGPVLVEFWAPWCGPCRLIHPEVAELSAQYAGKLKSFKMNTDESPSTANKYGIRSIPTIMIFVNGEKKDAVIGSVPRTTLISAIGKFV
>vpub_v1.1_g_28899
MASSVVPVLLCVFAFCLAPTISAEDSASKKYVLTLDHSNFSDTIAKHDFIVVEFYAPWCGHCKSLEPEYEKAASILSSHDPQIVLAKVDANEESNKDLAGQYEVKGFPTLKILRKGGKAIQDYKGPRKAEEIVEYLKKQSGPASVELKSTDDASTLIGDKNIVIVGVFPKLSGQEFENFIALAEKLRSEYEFGHTSDAKHLPRGESSVSGPLVRLFKPFDELFVDSKDFNVDALEKFVEESSTPTVTVFDNDQSNHPFVVKYFNSPDAKAMLFTNFSNEVTASLKPKFHEVAEKYKGEGIVFLMGDVEAAQGAFQYFGLREDQAPLIIIQTANGQKYLKPNVEADQVAPWLKDYKDGKVTPFRKSEPIPEVNDEPVKVVVADSLQQIVFNSGKNVLLEFYAPWCGHCKKLAPILDEVATSFQKEADVVIAKLDATTNDYPTDIFDVQGYPTLYFISSSGALVQYDGERTKEHMVEFIENNRNKAPQAVEQEAEPEPEPAKDEL
>vpub_v1.1_g_29371
MASSSLTFGSLLVVFGVIFAAVSGDGHGEVVVTLDHSNFTDYILNSDFVLVEFYAPWCGGCTAYAPKYEEAATLLQNHDPPIVLAKLDVADENNKEIATKFAIKKYPTLKIFAKGGKVLLDLKGPKQPEELVPYLKKHRGPASTEIKSPEDATNLIDANKIVLIGVFPDFSGKEFENFFTLAENLRIDYEFGHTSDAKFLPRGDSSVTGPLVRLFKPFDELFADTRDFDLLALGDFIDVRSTPTVTPYDKDPGNMLFITKFVRSPGSKAMLFADFSSEGIDTLKSKYQELAQQHKGEGIVFLFGDAEISEGFFKAFGVKEDQLPVLLIHDESDNKYLKTHVEPDHLASVLEAFKDGKLPLHLKSEPIPEANDEPLKVVVGDTIQDMVLKSEKNVLLAFYAPWDVDYKNFAPILDAVAIEYQSVPDVVISKIHAVENDYPKEIFEVKKSGELFFKRASGKMVKYGGKLTKEAIIDFIESHRDKVAEQAPAKDKAAEQESVKDEL
>vpub_v1.1_g_29931
MAVSTSFCPPPLTAPRAAVHDSHLNTAVPFSLTTRTKPQPLLRSNHAPPPLHIVCGRNPRGTNDLQKPTKPDPVYQNRLVTLFINRILKNGKKSLAFQILYRALKRIQMRTESNPLVVLRDAVNSVTPDVAVKSRRVGGSTHQIPVEIGAAQGKALAIRWLLDAARKRDGKSMVDRLSAELMDASKGNGEAVKRKESTHKMAEANRAFAHFPAVVTVDSWENSIVKSDIPVLVEFYASWCGPCRMVHRVIDEIAGEYDGKLKCFVLNTDTDLEIAEEYEIKAVPVVMLFKNGEKCETVVGTMPKEFYVAAVERIIQ
>vpub_v1.1_g_31267
LLEVYHPSCGNFPRFAPILDQVASSFQKEADVVIAKLDATKNDYPTDIFDVQGYPTLYFISSSGAVVQYDGGTKKHIVEFIENNRNKAPQAVEQEAEA
>vpub_v1.1_g_34425
MSSLHSLRSSNCDSIRFINMSTATIALLLLLFFFFSSLLLHPSSITSTDVVVLGDNNFSDFVTRNRYVMLNFHASWCKHCNRLAPEYAAAATMLKGEAVLAKIDANRGNELIYRYKISGYPTMLLLVDGAQKAVYTGSRTRDAIATWVRQKMGEHILSENHQVQQELSLEPDNILNINHIQDEF
>vpub_v1.1_g_36215
QIVVDFTASWCGPCRFISPILAEIAKKMTHVTFLKVDVDELKTVSEEWEVEAMPTFIFVREGKQIDKFVGAKKDELLQTIKKHAGDSSAESA
>vpub_v1.1_g_36763
AASALSDHDPPIVLAKFDAVEESNKEIAAKYGIKKYPTLKILTRGGKITLDFKGTRDTDGIVSYVKKHRGPASTEIGSTDEATSLINANKIVVVSTAQLHSLLVSSSCLVGVFPEFSGQEFENFVTLAERLRVDYEFAHTSDAKHLPRGDSSVTGPFVRLFKPFDELFSDTKDFKVDALFNFVEDSSTPSVTIFDKDPGNSVFITKYVQRPDSKVMLFANITDDLTDAIKTKYHEVAQQLKDEGLAFLFGDADLAEGVFRAFGLRKEQLPLVIVQATSGEKYLKTNLKPDDIAPWLKDFKEGKVPIYLKSEPIPEPNDEPLKNVVGVNLEDVFNSGKNVLVVFHIPWDVNYQKFEPTLQEVATEYQSVPDVVIAKFHESANDYDTELFKHDDIPTLFFKRASGQMVKYEGELTKEAVIDFIETSRDRVAEHEQVKEKAAAHEVGKDEL
