# Supplementary material for: Transcriptomics Identifies Modules of Differentially Expressed Genes and Novel Cyclotides in Viola pubescens
Source: Front Plant Sci. 2019 Feb 15;10:156. doi: 10.3389/fpls.2019.00156 (PMC6384259; doi:10.3389/fpls.2019.00156)
Supplement: Supplementary file 2 [file Data_Sheet_2.xlsx]

## Sheet: Additional_File5
Tissue-specific, logCPM expression data for 81 novel V. pubescens' cyclotides
BS = basal stem
US = upper stem
PT = petiole
LV = leaf
PD = peduncle
CH = chasmogamous flower
CL = cleistogamous flower
FR = fruit
Gene_ID	BS	BS	BS	US	US	US	PT	PT	PT	LV	LV	LV	PD	PD	PD	CH	CH	CH	CL	CL	CL	FR	FR	FR
vpub_v1.1_g_00105	-1.69217	-0.931357	-1.18542	-1.19472	-2.83873	-3.66349	-1.37502	-0.615263	-2.29371	-6.14362	-1.59726	-6.14362	-6.14362	-3.00062	-6.14362	-6.14362	-6.14362	-3.86892	-4.04446	-6.14362	-6.14362	-1.47001	-6.14362	-3.52025
vpub_v1.1_g_00393	-2.91843	-6.14362	-3.33271	-3.34096	-2.30327	-3.66349	-3.4994	-3.93815	-3.19698	-3.57993	-3.42299	-3.45065	-6.14362	-6.14362	-6.14362	-6.14362	-6.14362	-6.14362	-6.14362	-6.14362	-6.14362	-6.14362	-6.14362	-6.14362
vpub_v1.1_g_01733	6.01807	5.05587	3.36633	-0.939496	0.113803	-1.3119	0.720996	1.09391	0.784414	-2.16757	-6.14362	-0.660401	-6.14362	-3.00062	-6.14362	3.03422	0.427388	3.13927	-2.0207	-1.9841	-1.25358	-1.27112	-1.73337	-2.10048
vpub_v1.1_g_01933	3.26039	3.79443	2.40354	0.769811	1.18628	-2.2621	0.352663	2.18949	0.0814399	-2.16757	-1.03302	-2.02266	1.18819	0.166284	0.557157	0.976053	1.31846	0.137696	-2.7035	-1.17244	-1.65249	2.44098	-4.01364	-0.928982
vpub_v1.1_g_02220	14.2921	12.0704	13.7495	14.8527	14.7866	14.6796	11.4603	13.4313	13.6006	10.1849	8.90906	10.9856	13.4284	13.5131	13.5108	13.0551	12.996	14.6294	15.7135	15.7177	15.641	14.7183	13.7949	14.1722
vpub_v1.1_g_02636	6.51389	5.12077	7.86448	7.8379	7.67767	7.86343	7.1726	8.57226	7.82487	7.56277	2.60977	8.14073	4.04944	4.2947	4.30325	7.85599	8.21457	8.60007	9.34165	8.60477	8.72021	6.9256	7.2647	7.46816
vpub_v1.1_g_03183	-6.14362	-6.14362	-6.14362	-6.14362	-6.14362	-6.14362	-6.14362	-6.14362	-6.14362	-6.14362	-6.14362	-6.14362	-6.14362	-6.14362	-6.14362	-6.14362	-6.14362	-6.14362	-6.14362	-6.14362	-6.14362	-6.14362	-6.14362	-6.14362
vpub_v1.1_g_03752	-6.14362	-6.14362	-6.14362	-6.14362	-6.14362	-6.14362	-6.14362	-6.14362	-6.14362	-6.14362	-6.14362	-6.14362	-6.14362	-6.14362	-6.14362	-6.14362	-6.14362	-6.14362	-6.14362	-6.14362	-6.14362	-6.14362	-6.14362	-6.14362
vpub_v1.1_g_04189	7.59005	0.914529	-0.713309	-1.50502	0.876497	-2.79894	-0.401728	0.948709	0.523747	-3.57993	-6.14362	-1.6285	-2.837	-2.08468	-3.83256	-3.73363	0.609991	-3.86892	0.17524	-2.28599	0.518594	3.887	-3.18864	0.0514602
vpub_v1.1_g_04572	4.32881	4.57951	2.78829	3.09646	3.18951	0.920371	1.16515	3.42199	2.43925	-0.811003	0.165309	0.902898	0.546884	0.166284	0.557157	0.622811	1.35303	1.97223	2.67333	3.10512	2.72239	3.01757	2.73418	2.15959
vpub_v1.1_g_05090	6.08612	7.83288	9.07829	8.70475	7.87008	7.57671	5.75135	8.25395	6.80245	2.82805	-0.462047	3.7597	0.0294196	2.23977	1.87074	2.97946	2.81359	2.34029	2.43385	2.91738	1.40509	2.76923	3.66363	2.33685
vpub_v1.1_g_05321	-6.14362	-6.14362	-6.14362	-6.14362	-6.14362	-6.14362	-6.14362	-6.14362	-6.14362	-6.14362	-6.14362	-6.14362	-6.14362	-6.14362	-6.14362	-6.14362	-6.14362	-6.14362	-6.14362	-6.14362	-6.14362	-6.14362	-6.14362	-6.14362
vpub_v1.1_g_05952	-2.38583	-1.18663	-0.930136	-6.14362	-3.69967	-6.14362	-3.4994	-0.455117	-1.74249	-3.57993	-6.14362	-1.31925	-6.14362	-1.52886	-2.06895	-6.14362	-6.14362	-6.14362	-3.22348	-6.14362	-6.14362	-3.04856	-2.2848	-3.52025
vpub_v1.1_g_06092	14.5424	14.7063	14.8395	13.7131	13.9898	14.172	14.1174	13.9753	15.3844	13.9268	13.1602	14.044	13.7689	15.1864	15.1279	12.7875	13.1038	12.7822	13.2791	13.179	12.3385	10.8248	13.6515	13.259
vpub_v1.1_g_06147	5.06112	6.23566	5.06814	5.90177	5.5294	5.20947	3.39063	4.01888	3.70219	4.14825	0.442202	6.55275	3.19143	3.7583	3.22866	2.53901	1.35303	3.95828	6.10669	4.32615	2.95694	4.60877	4.59315	5.57785
vpub_v1.1_g_07197	-0.468125	1.31046	-0.713309	-2.44824	-1.91364	-2.79894	-1.68377	-3.93815	-0.777046	-6.14362	-6.14362	-3.45065	-6.14362	-2.08468	-3.83256	-6.14362	-2.88776	-6.14362	-6.14362	-6.14362	-6.14362	-6.14362	-6.14362	-6.14362
vpub_v1.1_g_07214	-6.14362	-6.14362	-6.14362	-6.14362	-6.14362	-6.14362	-6.14362	-6.14362	-6.14362	-6.14362	-6.14362	-6.14362	-6.14362	-6.14362	-6.14362	-6.14362	-6.14362	-6.14362	-6.14362	-6.14362	-6.14362	-6.14362	-6.14362	-6.14362
vpub_v1.1_g_08374	0.257505	-2.44051	0.849174	2.34677	0.605792	2.59411	5.15959	5.2957	5.38444	9.41428	8.715	9.42595	5.32041	5.89114	5.32912	2.05801	2.71071	2.71906	3.35545	3.1131	3.23825	4.06312	3.59114	3.59229
vpub_v1.1_g_08591	0.393456	3.74038	0.915773	1.96466	0.826268	0.87013	0.720996	0.986402	1.41761	0.170984	-0.816608	-0.209793	0.82818	-1.78017	0.252333	-1.9531	-6.14362	-3.02627	-0.0148255	-2.28599	-0.571978	-1.47001	-0.117592	0.149683
vpub_v1.1_g_09195	10.331	8.87133	9.39571	9.1704	8.88411	8.18799	7.54443	8.1381	8.87205	10.5283	9.69694	9.96119	9.40512	10.0524	9.94149	9.50289	9.63188	10.0155	10.3359	10.4629	10.8053	10.1702	9.53069	9.83844
vpub_v1.1_g_09865	8.41282	6.21434	7.45892	7.19506	6.94195	7.18421	5.66527	8.52532	8.08043	2.58242	1.43467	4.15362	7.49221	6.13809	6.52863	6.33331	6.5407	6.32287	10.5581	7.8413	8.73589	8.2744	6.17374	6.01413
vpub_v1.1_g_10168	-6.14362	-6.14362	-6.14362	-6.14362	-6.14362	-6.14362	-6.14362	-6.14362	-6.14362	-6.14362	-6.14362	-6.14362	-6.14362	-6.14362	-6.14362	-6.14362	-6.14362	-6.14362	-6.14362	-6.14362	-6.14362	-6.14362	-6.14362	-6.14362
vpub_v1.1_g_10357	-6.14362	-6.14362	-6.14362	-6.14362	-6.14362	-6.14362	-6.14362	-6.14362	-6.14362	-6.14362	-6.14362	-6.14362	-6.14362	-6.14362	-6.14362	-6.14362	-6.14362	-6.14362	-6.14362	-6.14362	-6.14362	-6.14362	-6.14362	-6.14362
vpub_v1.1_g_11081	4.41122	4.15962	4.41223	4.05181	4.27987	4.156	5.07628	4.85973	4.67485	4.6771	4.21726	4.91129	4.26773	4.19349	4.35553	4.37177	4.56827	4.16456	4.83255	4.76393	4.72284	4.29452	4.46484	4.53804
vpub_v1.1_g_11510	-2.38583	-2.44051	-6.14362	-3.34096	-6.14362	-6.14362	-6.14362	-3.46141	-6.14362	-6.14362	-6.14362	-6.14362	-6.14362	-6.14362	-6.14362	-3.73363	-6.14362	-3.86892	-6.14362	-4.01463	-6.14362	-3.04856	-6.14362	-6.14362
vpub_v1.1_g_12025	-2.91843	0.268625	-2.43936	-3.34096	-2.30327	-6.14362	-2.61966	-2.37354	-6.14362	-0.998543	-6.14362	-3.45065	-2.837	-6.14362	-6.14362	-2.87617	-0.840365	-6.14362	-1.77154	-1.73459	-1.25358	-2.31544	-6.14362	-3.52025
vpub_v1.1_g_12074	-6.14362	-6.14362	-6.14362	-6.14362	-6.14362	-6.14362	-6.14362	-6.14362	-6.14362	-6.14362	-6.14362	-6.14362	-6.14362	-6.14362	-6.14362	-6.14362	-6.14362	-6.14362	-6.14362	-6.14362	-6.14362	-6.14362	-6.14362	-6.14362
vpub_v1.1_g_12341	10.5109	8.54987	9.808	8.50638	8.67961	9.02117	7.35843	9.38824	8.40476	4.73094	6.51728	5.9938	6.52914	6.75994	6.67508	8.63613	8.39648	7.2469	8.02158	9.07369	8.29248	6.48678	8.32777	6.11636
vpub_v1.1_g_13255	5.93136	5.12781	5.34987	4.964	5.72713	5.04654	2.66175	3.93943	4.44273	2.15733	2.32101	1.40218	3.07779	3.05733	3.70233	4.84287	4.64002	4.92963	6.90206	6.94979	6.65495	6.32047	4.30669	5.68615
vpub_v1.1_g_13940	5.41673	4.892	4.82558	4.4141	3.87294	4.54028	5.19805	5.54655	5.63091	7.35988	6.51977	7.26204	6.07971	6.22186	6.0695	4.42192	4.52723	4.78652	3.68221	4.08782	4.21766	5.59168	4.73188	5.3592
vpub_v1.1_g_14613	5.59655	5.82397	5.83601	5.82639	5.94874	5.88796	6.04548	5.98106	6.22857	5.52823	5.46422	5.89041	5.76288	5.68443	5.93323	6.40467	6.43171	6.16042	6.13653	6.29239	6.13601	6.14067	6.23724	6.52942
vpub_v1.1_g_14656	-6.14362	-6.14362	-6.14362	-6.14362	-6.14362	-6.14362	-6.14362	-6.14362	-6.14362	-6.14362	-6.14362	-6.14362	-6.14362	-6.14362	-6.14362	-6.14362	-6.14362	-6.14362	-6.14362	-6.14362	-6.14362	-6.14362	-6.14362	-6.14362
vpub_v1.1_g_16595	-0.725525	-3.33379	-6.14362	-6.14362	-6.14362	-6.14362	-6.14362	-2.81728	-6.14362	-6.14362	-6.14362	-6.14362	-6.14362	-6.14362	-6.14362	-6.14362	-2.88776	-6.14362	-4.04446	-4.01463	-3.94782	-3.04856	-6.14362	-3.52025
vpub_v1.1_g_17131	1.87816	4.43386	0.269864	-1.50502	-1.13961	-3.66349	-1.68377	-0.672854	-1.34463	0.170984	-1.28773	0.0275802	0.546884	1.12087	1.68204	-6.14362	-6.14362	-6.14362	-6.14362	-2.28599	-3.94782	-4.61444	-6.14362	-3.52025
vpub_v1.1_g_17446	13.8044	12.5325	12.978	13.0094	13.0299	12.8653	12.6223	13.2063	13.8606	13.0331	13.6225	13.7677	14.6386	13.9757	13.9621	12.8105	12.8063	12.9893	14.1225	14.4466	14.5499	13.3017	13.4068	12.7706
vpub_v1.1_g_17934	2.49189	8.12026	7.07134	5.86458	7.18678	7.02829	5.10459	5.20068	4.77326	-0.645062	-0.17766	-0.660401	2.89468	2.95797	3.13972	5.24463	4.65741	4.27389	4.61185	4.91078	4.85498	5.47191	3.68522	5.11361
vpub_v1.1_g_18184	8.53202	8.70902	8.43281	8.25691	8.47196	7.69327	6.27868	5.12772	7.43481	1.02082	1.04997	0.642045	3.86866	6.21327	5.38049	2.569	3.65476	3.11234	4.59253	4.63408	3.2613	1.12114	3.86623	3.8107
vpub_v1.1_g_18720	5.75641	7.91853	3.33016	2.46194	2.29692	0.818076	-1.37502	3.73041	1.69637	-3.57993	-6.14362	-0.494064	-1.91181	-2.08468	-0.799334	5.2046	5.16516	3.5736	1.64472	2.35635	2.31574	2.44098	1.50203	2.65379
vpub_v1.1_g_18819	6.87495	6.63426	6.475	6.74326	6.29418	6.86231	7.22655	7.92838	7.41729	9.00121	8.339	8.79286	6.98887	7.05383	7.08967	6.94452	7.02365	6.92268	6.73907	6.60191	6.47851	7.4948	7.01747	7.14626
vpub_v1.1_g_18836	-3.77186	-6.14362	-6.14362	-6.14362	-6.14362	-6.14362	-6.14362	-6.14362	-6.14362	-6.14362	-6.14362	-6.14362	-6.14362	-6.14362	-6.14362	-6.14362	-6.14362	-6.14362	-6.14362	-6.14362	-6.14362	-6.14362	-6.14362	-6.14362
vpub_v1.1_g_19960	5.00915	4.81564	5.72432	5.68656	4.99099	5.38968	4.9811	5.70473	5.67713	3.92227	6.11637	3.95934	5.62625	6.28882	6.12268	3.92119	4.173	4.97267	6.07423	5.13307	5.40304	5.33272	6.05646	6.00759
vpub_v1.1_g_20166	-0.151853	0.545741	0.915773	0.358757	1.26381	0.764073	1.38624	0.870233	-0.0541363	0.689019	-0.0540542	1.3152	0.973909	0.0163004	0.109745	1.58716	1.00728	1.16379	1.38727	0.624191	0.753473	0.805966	0.625458	1.14046
vpub_v1.1_g_20940	-6.14362	-6.14362	-6.14362	-6.14362	-6.14362	-6.14362	-6.14362	-6.14362	-6.14362	-6.14362	-6.14362	-6.14362	-6.14362	-6.14362	-6.14362	-6.14362	-6.14362	-6.14362	-6.14362	-6.14362	-6.14362	-6.14362	-6.14362	-6.14362
vpub_v1.1_g_21623	5.04315	6.56079	7.06952	4.05181	3.99163	2.71289	2.06138	1.5617	0.319478	-1.46775	-0.462047	1.01754	-1.60532	3.23761	2.84562	0.0726407	1.51445	-6.14362	1.8995	2.38299	1.0988	-2.31544	0.273013	0.409648
vpub_v1.1_g_22182	8.5986	9.02759	9.16019	9.14864	9.24026	9.11078	8.93107	8.45994	8.7316	7.57649	8.68925	7.54907	8.67756	8.5661	8.72299	9.12381	8.93574	9.02866	8.83848	9.212	9.13601	9.3524	9.40702	9.39955
vpub_v1.1_g_23339	1.21264	4.15274	2.15053	0.83963	1.76825	-0.743922	1.50427	1.85448	1.51663	-0.998543	-6.14362	-0.660401	-0.636705	0.302134	-2.45573	-6.14362	-6.14362	-6.14362	-6.14362	-2.28599	-6.14362	-0.940489	-3.18864	-6.14362
vpub_v1.1_g_23523	10.3406	10.1413	8.97154	8.27907	8.49199	7.38484	6.03244	8.76503	8.10351	0.416047	1.39183	2.14449	7.37354	7.91791	7.86211	6.51372	6.79051	6.5901	8.5832	8.60211	8.12143	8.99094	7.62315	8.61504
vpub_v1.1_g_24167	7.79885	8.21744	8.2879	8.43169	8.65081	8.56164	8.48251	7.66085	7.78135	6.95623	7.31633	7.07034	7.37409	7.26134	7.52193	7.84225	7.74029	7.60536	8.19101	8.40354	8.28991	8.23841	8.42661	8.55497
vpub_v1.1_g_24210	10.9013	11.4195	10.4359	9.17167	9.13119	9.03531	8.18878	6.21139	8.94081	3.17737	2.17705	3.93037	7.28612	9.70825	9.3956	4.36324	4.74788	4.67442	4.94779	3.86968	3.06569	2.74072	5.02007	4.01345
vpub_v1.1_g_24289	13.9211	14.2052	14.34	14.2501	14.2317	14.1031	12.1624	12.2498	11.3944	6.14455	6.35112	6.27014	9.43964	11.1064	10.4856	7.75731	8.10886	8.08489	8.64478	9.60403	8.67801	7.2009	9.05774	7.30122
vpub_v1.1_g_24917	1.90116	2.76916	5.91953	6.32334	4.97955	4.21254	3.828	2.08043	5.26846	0.625464	-6.14362	0.409885	-3.6981	-1.31491	0.442835	-0.105347	0.14125	0.0646714	-0.8068	-0.551532	-2.58973	-1.27112	0.214823	1.51683
vpub_v1.1_g_25249	-6.14362	-6.14362	-6.14362	-6.14362	-6.14362	-6.14362	-6.14362	-6.14362	-6.14362	-6.14362	-6.14362	-6.14362	-6.14362	-6.14362	-6.14362	-6.14362	-6.14362	-6.14362	-6.14362	-6.14362	-6.14362	-6.14362	-6.14362	-6.14362
vpub_v1.1_g_25457	9.97887	8.14907	7.71354	5.4916	5.4023	4.7034	4.35342	7.37518	7.47538	4.9543	2.0993	5.03552	5.3113	7.36291	7.05239	4.87623	6.01371	3.77587	6.12024	5.30489	6.44703	6.33533	3.93543	4.48258
vpub_v1.1_g_25492	13.2583	13.4097	12.6643	11.4358	11.3202	11.2765	11.2394	10.9355	10.4492	6.74539	5.29726	6.81397	7.43199	10.0739	9.26632	6.12707	7.04627	6.15933	5.08642	5.91843	4.12854	3.93309	7.67229	3.9603
vpub_v1.1_g_26700	6.0811	6.65875	6.78329	7.03779	7.03611	6.88937	6.35267	5.92515	6.26819	4.94782	5.69318	5.03552	5.40637	5.39829	5.8655	6.44868	6.48529	6.56963	7.84539	7.79462	7.70019	7.72089	7.44042	7.75087
vpub_v1.1_g_27274	5.36598	6.08116	5.54658	5.60119	5.32528	5.78495	5.7293	6.13216	6.14204	6.70176	6.13272	6.57515	5.46096	5.66409	5.60475	6.47268	6.53694	6.60788	5.4383	5.46466	5.21907	5.79253	5.8171	5.93542
vpub_v1.1_g_27293	4.88776	4.7304	4.59099	4.41981	4.2938	4.57598	5.04741	5.15487	5.32078	5.62686	5.02677	5.27617	4.65395	4.27419	4.28677	4.7213	4.84216	4.65589	3.53386	3.86496	4.32365	5.02281	4.4301	4.78344
vpub_v1.1_g_27295	-6.14362	-6.14362	-6.14362	-6.14362	-6.14362	-6.14362	-6.14362	-6.14362	-6.14362	-6.14362	-6.14362	-6.14362	-6.14362	-6.14362	-6.14362	-6.14362	-6.14362	-6.14362	-6.14362	-6.14362	-6.14362	-6.14362	-6.14362	-6.14362
vpub_v1.1_g_28166	0.0260491	1.03916	0.849174	3.72281	3.26687	2.03384	-1.37502	0.808441	1.07176	-6.14362	-2.5368	-0.344938	-1.60532	-0.340516	1.06204	1.1841	1.28304	4.82019	1.7481	1.31953	1.37723	1.57317	2.6598	3.67709
vpub_v1.1_g_28761	-6.14362	-6.14362	-6.14362	-6.14362	-6.14362	-6.14362	-6.14362	-6.14362	-6.14362	-6.14362	-6.14362	-6.14362	-6.14362	-6.14362	-6.14362	-6.14362	-6.14362	-6.14362	-6.14362	-6.14362	-6.14362	-6.14362	-6.14362	-6.14362
vpub_v1.1_g_28899	7.28977	7.67795	7.83036	8.0807	7.9415	8.10115	7.42605	7.16911	7.43718	6.43143	6.78794	6.48836	6.3824	6.62716	6.60288	8.03282	8.10348	8.10551	9.07955	9.13277	9.04514	8.72703	8.62955	8.8254
vpub_v1.1_g_29371	8.3825	8.15554	8.03146	7.51746	7.84231	7.58159	5.94295	6.32286	7.25288	4.48457	6.01061	4.72138	5.21196	5.30028	5.68553	7.2667	7.23419	7.26789	9.25457	9.11637	9.04084	7.61532	6.36563	8.05408
vpub_v1.1_g_29524	9.11243	9.47493	9.24702	9.22604	9.37562	8.61886	7.25909	5.63376	8.43158	1.20601	0.674412	1.56184	4.60631	6.82764	6.56239	1.33133	3.34703	2.65832	4.15067	4.89003	3.34998	1.85435	4.99651	4.30746
vpub_v1.1_g_29737	1.56915	1.20798	0.460392	0.450872	1.37281	0.87013	0.58473	0.505089	1.00511	4.58405	4.63048	4.34141	1.74331	2.02092	0.557157	4.90296	4.05196	4.83947	6.55102	5.83886	6.20796	2.17728	3.55642	3.66883
vpub_v1.1_g_29858	7.73908	10.3408	6.52918	4.19853	4.3615	1.10548	-2.61966	1.73778	3.84242	-3.57993	-1.59726	-1.31925	4.47781	-0.68141	2.30634	3.07659	2.73713	1.89008	2.20588	6.95313	6.4612	2.90902	2.91865	1.14046
vpub_v1.1_g_29931	4.06428	3.92131	3.75078	3.94499	3.43551	3.8795	3.92995	5.0397	4.27607	4.58405	3.02864	4.37942	3.35114	3.5489	3.44457	3.95564	4.10364	3.96331	4.52426	4.06332	4.16973	5.28613	4.2353	4.46361
vpub_v1.1_g_30118	12.2938	12.417	12.5552	11.2989	11.5672	10.8616	8.75102	9.38284	10.8201	3.92887	3.70753	4.31923	8.73214	9.92649	9.67718	5.21175	6.35809	5.51864	4.82074	6.49605	4.936	4.10622	6.50948	5.26098
vpub_v1.1_g_30422	13.9137	13.9456	13.7651	12.756	13.039	12.9745	11.8341	11.1789	11.7668	9.2106	11.5837	9.05814	12.5236	14.0562	13.7073	6.86291	7.18286	7.77483	10.8079	9.83001	9.12676	7.63771	10.1907	10.5301
vpub_v1.1_g_30518	10.4064	11.5669	11.5746	11.78	12.6508	12.5972	12.3608	11.0451	12.2136	8.58247	2.40958	9.30402	8.95294	9.40835	9.80199	10.1444	9.90628	9.57016	7.72922	8.61341	8.18659	9.27568	11.6548	11.2072
vpub_v1.1_g_30858	10.6301	8.51541	8.20294	5.80474	5.8263	4.83692	3.21711	8.5334	8.23111	2.84209	2.68267	1.92707	5.8567	8.14411	7.88213	3.96695	4.77999	3.33828	3.13666	2.68017	4.73661	2.55671	2.6155	1.62324
vpub_v1.1_g_31267	-6.14362	-6.14362	-6.14362	-2.44824	-1.91364	-3.66349	-1.68377	-3.46141	-3.19698	-6.14362	-6.14362	-3.45065	-6.14362	-6.14362	-6.14362	-6.14362	-2.35404	-6.14362	-6.14362	-6.14362	-3.94782	-3.88889	-6.14362	-1.39895
vpub_v1.1_g_32467	5.11375	4.82865	4.19479	3.02334	3.2287	2.10073	3.22859	3.02919	4.54011	3.87523	4.39589	3.91566	4.0712	3.44998	3.65818	2.44513	1.7915	2.41564	2.8134	3.53152	3.92227	3.95311	2.52262	2.68688
vpub_v1.1_g_34339	12.0592	13.1041	12.1912	10.8971	12.1015	11.7283	9.59526	7.58571	8.59381	6.41743	3.79233	8.77489	9.40632	9.91801	9.62068	10.0399	9.12172	9.69601	10.9331	11.1954	11.287	9.23926	9.47687	9.32661
vpub_v1.1_g_34425	-6.14362	-6.14362	-6.14362	-6.14362	-6.14362	-6.14362	-6.14362	-6.14362	-6.14362	-6.14362	-6.14362	-6.14362	-6.14362	-6.14362	-6.14362	-6.14362	-6.14362	-6.14362	-6.14362	-6.14362	-6.14362	-6.14362	-6.14362	-6.14362
vpub_v1.1_g_34576	7.76673	8.86213	8.28869	8.74368	8.70394	8.54197	7.34992	7.09205	6.50971	7.57964	7.48696	7.6177	5.85199	4.90355	5.95815	8.32628	7.728	8.10095	9.40382	9.75724	9.12309	6.94915	9.98083	9.213
vpub_v1.1_g_34819	8.37482	9.3549	8.00924	6.77479	6.47009	6.31861	6.17867	6.51404	7.14577	1.65111	0.355677	0.409885	4.60631	7.37018	7.03214	4.01675	3.63383	2.37091	3.46269	4.75885	2.89933	1.37966	6.36981	5.60408
vpub_v1.1_g_35758	-6.14362	-6.14362	-6.14362	-6.14362	-6.14362	-6.14362	-6.14362	-6.14362	-6.14362	-6.14362	-6.14362	-6.14362	-6.14362	-6.14362	-6.14362	-6.14362	-6.14362	-6.14362	-6.14362	-6.14362	-6.14362	-6.14362	-6.14362	-6.14362
vpub_v1.1_g_36215	8.84271	8.75886	8.7202	8.56842	8.52999	8.38199	9.30885	8.92523	9.0867	10.2128	10.5118	10.0873	9.6105	9.55124	9.56337	9.2613	9.10423	9.08485	8.95894	8.93511	8.84354	9.41813	9.1556	9.55886
vpub_v1.1_g_36342	-6.14362	-6.14362	-6.14362	-6.14362	-6.14362	-6.14362	-6.14362	-6.14362	-6.14362	-6.14362	-6.14362	-6.14362	-6.14362	-6.14362	-6.14362	-6.14362	-6.14362	-6.14362	-6.14362	-6.14362	-6.14362	-6.14362	-6.14362	-6.14362
vpub_v1.1_g_36613	9.93932	11.0159	8.8668	9.7091	10.2544	9.94432	5.85125	6.4535	7.31353	1.85882	2.7689	4.2388	4.5609	5.64983	6.14228	8.66353	9.25566	9.6945	10.6465	12.1535	11.855	6.68796	7.39365	7.93646
vpub_v1.1_g_36763	6.69996	7.04244	6.18723	5.89769	6.39346	5.99733	5.57823	5.62109	6.40373	4.41109	4.51546	4.00174	4.7881	4.70029	4.86307	5.69905	5.45898	5.68167	7.47985	7.62257	7.5204	6.83949	5.14218	7.22159
